# Supplementary material
Source: ML conference proceedings conference paper supplement (https://openreview.net/forum?id=R8GF0EsNsI)
Supplement: supplementary_material [file attachment]

## Supplementary material

### A Additional Motivating Examples

The bilevel optimization problem in (I) provides a versatile framework that covers a broad class of optimization problems. In addition to the motivating examples provided in the main body of the paper, here we also provide a generic example of stochastic convex constrained optimization that can be formulated as (II). We further present a more general form of the examples covered in the main body.

*Generic Example: Stochastic convex optimization with many conic constraints.* Consider the following convex optimization problem

$$\min_{\mathbf{x} \in \mathbb{R}^d} \mathbb{E}[\tilde{f}(\mathbf{x}, \theta)] \quad \text{s.t.} \quad h(\mathbf{x}, \xi) \in -\mathcal{K}, \forall \xi \in \Omega,$$

where  $\mathcal{K} \subseteq \mathbb{R}^d$  is a closed convex cone. This problem can be formulated as a special case of (I) by letting  $\tilde{g}(\mathbf{x}, \xi) = \frac{1}{2}d_{-\mathcal{K}}^2(h(\mathbf{x}, \xi))$  where  $d_{-\mathcal{K}}(\cdot) \triangleq \|\cdot - \mathcal{P}_{-\mathcal{K}}(\cdot)\|$  denotes the distance function and  $\mathcal{P}_{-\mathcal{K}}(\cdot)$  denotes the projection map. Our proposed framework provides an efficient method for solving this class of problems when the projections onto  $\mathcal{K}$  can be computed efficiently, while the projection onto the preimage  $h^{-1}(-\mathcal{K}, \xi)$  is not practical, e.g., when  $\mathcal{K}$  is the positive semidefinite cone, computing a projection onto the preimage set requires solving a nonlinear SDP.

#### A.1 Lexicographic optimization

*Example 1 (over-parameterized regression)* can be generalized as a broader class of problem, which is known as lexicographic optimization [13] and uses the secondary loss to improve generalization. The problem can be formulated as the following stochastic simple bilevel optimization problem,

$$\min_{\beta \in \mathbb{R}^d} \mathcal{L}(\beta) \quad \text{s.t.} \quad \beta \in \arg \min_{\theta \in \mathcal{Z}} \ell_{\text{tr}}(\theta) = \mathbb{E}_{\mathcal{D}_{\text{tr}}}[\ell(y, \hat{y}_{\theta}(\mathbf{x}))] \quad (17)$$

In general, the lower-level problem could have multiple optimal solutions and be very sensitive to small perturbations. To tackle the issue, we use a secondary criterion  $\mathcal{L}()$  to select some of the optimal solutions with our desired properties. For instance, we can find the optimal solutions with minimal  $\ell_2$ -norm by letting  $\mathcal{L}(\beta) = \|\beta\|^2$ , which is also known as *Lexicographic  $\ell_2$  Regularization*.

#### A.2 Lifelong learning

*Example 2 (dictionary learning)* is an instance of a popular framework known as lifelong learning, which can be formulated as follows,

$$\min_{\beta} \frac{1}{n'} \sum_{i=1}^{n'} \ell(\langle \mathbf{x}'_i, \beta \rangle, y'_i) \quad \text{s.t.} \quad \sum_{(\mathbf{x}_i, y_i) \in \mathcal{M}} \ell(\langle \mathbf{x}_i, \beta \rangle, y_i) \leq \sum_{(\mathbf{x}_i, y_i) \in \mathcal{M}} \ell(\langle \mathbf{x}_i, \beta^{(t-1)} \rangle, y_i) \quad (18)$$

In this problem, the objective is the training loss on the current tasks  $\mathcal{D}_t = \{(\mathbf{x}'_i, y'_i)\}_{i=1}^{n'}$ . While the constraint enforces that the model parameterized by  $\beta$  performs no worse than the previous one on the episodic memory  $\mathcal{M}$  (i.e., data samples from all the past tasks).

In the paper, we discuss a variant of the problem above, where we slightly change the constraint and ensure that the current model also minimizes the error on the past tasks. It can be formulated as the following finite-sum/stochastic simple bilevel optimization problem [12],

$$\min_{\beta} \frac{1}{n'} \sum_{i=1}^{n'} \ell(\langle \mathbf{x}'_i, \beta \rangle, y'_i) \quad \text{s.t.} \quad \beta \in \arg \min_{\mathbf{z}} \sum_{(\mathbf{x}_i, y_i) \in \mathcal{M}} \ell(\langle \mathbf{x}_i, \mathbf{z} \rangle, y_i). \quad (19)$$

### B Supporting lemmas

#### B.1 Proof of Lemma 4.1

Before we proceed to the proof for Lemma 4.1 we present the following technical lemma, which gives us an upper bound for a complex term appearing in the following analysis.

476 **Lemma B.1.** Define  $\rho_t = 1/(t+1)^\omega$  where  $\omega \in (0, 1]$  and  $t \geq 1$ . For all  $t \geq 2$ , let  $\{s_t\}$  be a  
 477 sequence of real numbers given by

$$s_t = \sum_{\tau=2}^t \left( \rho_\tau \prod_{k=\tau}^t (1 - \rho_k) \right)^2.$$

478 Then it holds that

$$s_t \leq \frac{1}{(t+1)^\omega}. \quad (20)$$

479 *Proof.* We prove the result by induction. For  $t = 2$ , we can verify that

$$S = \left( \frac{1}{3^\omega} \cdot \frac{3^\omega - 1}{3^\omega} \right)^2 \leq \frac{1}{3^{2\omega}} \leq \frac{1}{3^\omega}.$$

480 Now we suppose that the inequality in (20) holds when  $t = T$  for some  $T \geq 2$ , i.e.,

$$s_T = \sum_{\tau=2}^T \left( \rho_\tau \prod_{k=\tau}^T (1 - \rho_k) \right)^2 \leq \frac{1}{(T+1)^\omega}.$$

481 First note that the sequence  $\{s_t\}$  satisfies the following recurrence relation:

$$\begin{aligned} s_{T+1} &= \sum_{\tau=2}^{T+1} \left( \rho_\tau \prod_{k=\tau}^{T+1} (1 - \rho_k) \right)^2 = (1 - \rho_{T+1})^2 \sum_{\tau=2}^{T+1} \left( \rho_\tau \prod_{k=\tau}^T (1 - \rho_k) \right)^2 \\ &= (1 - \rho_{T+1})^2 \left[ \sum_{\tau=2}^T \left( \rho_\tau \prod_{k=\tau}^T (1 - \rho_k) \right)^2 + \rho_{T+1}^2 \right] \\ &= (1 - \rho_{T+1})^2 (s_T + \rho_{T+1}^2). \end{aligned}$$

482 Moreover, since  $\alpha \in (0, 1]$ , we have  $(T+2)^\omega - 1 \leq (t+1)^\omega$ . Therefore, we obtain

$$\begin{aligned} s_{T+1} &\leq \left( \frac{(T+2)^\omega - 1}{(T+2)^\omega} \right)^2 \left( \frac{1}{(t+1)^\omega} + \frac{1}{(T+2)^{2\omega}} \right) \\ &\leq \frac{((T+2)^\omega - 1)(t+1)^\omega}{(T+2)^{2\omega}} \left( \frac{1}{(t+1)^\omega} + \frac{1}{(T+1)^{2\omega}} \right) \\ &= \frac{(T+2)^\omega - 1}{(T+2)^{2\omega}} \frac{(T+1)^\omega + 1}{(T+1)^\omega} \\ &= \frac{(T+2)^\omega (t+1)^\omega + (T+2)^\omega - 1 - (t+1)^\omega}{(T+2)^{2\omega} (t+1)^\omega} \\ &\leq \frac{(T+2)^\omega (t+1)^\omega}{(T+2)^{2\omega} (t+1)^\omega} = \frac{1}{(T+2)^\omega}. \end{aligned}$$

483 By induction, the inequality in (20) holds for all  $t \geq 2$ . □

484 Now we proceed to prove Lemma 4.1

485 *Proof of Lemma 4.1.* We show the proof of part (i) here. The proof of part (ii) is very similar to  
 486 part (i). The first step is to reformulate  $\mathbf{e}_t = \widehat{\nabla} g_t - \nabla g(\mathbf{x}_t)$  as the sum of a martingale difference  
 487 sequence. For  $t \geq 1$ , by unrolling the recurrence we have

$$\begin{aligned} \mathbf{e}_t &= (1 - \beta_t) \mathbf{e}_{t-1} + \beta_t (\nabla \tilde{g}(\mathbf{x}_t, \xi_t) - \nabla g(\mathbf{x}_t)) \\ &\quad + (1 - \beta_t) (\nabla \tilde{g}(\mathbf{x}_t, \xi_t) - \nabla \tilde{g}(\mathbf{x}_{t-1}, \xi_t) - (\nabla g(\mathbf{x}_t) - \nabla g(\mathbf{x}_{t-1}))) \\ &= \prod_{k=2}^t (1 - \beta_k) \mathbf{e}_1 + \sum_{\tau=2}^t \prod_{k=\tau}^t (1 - \beta_k) (\nabla \tilde{g}(\mathbf{x}_\tau, \xi_\tau) - \nabla \tilde{g}(\mathbf{x}_{\tau-1}, \xi_\tau) - (\nabla g(\mathbf{x}_\tau) - \nabla g(\mathbf{x}_{\tau-1}))) \\ &\quad + \sum_{\tau=2}^t \beta_\tau \prod_{k=\tau+1}^t (1 - \beta_k) (\nabla \tilde{g}(\mathbf{x}_\tau, \xi_\tau) - \nabla g(\mathbf{x}_\tau)). \end{aligned} \quad (21)$$

Thus, we can write  $\mathbf{e}_t$  as the sum  $\mathbf{e}_t = \sum_{\tau=1}^t \zeta_\tau$ , where we define  $\zeta_1 = \prod_{k=2}^t (1 - \beta_k) \mathbf{e}_1$  and

$$\zeta_\tau = \prod_{k=\tau}^t (1 - \beta_k) (\nabla \tilde{g}(\mathbf{x}_\tau, \xi_\tau) - \nabla \tilde{g}(\mathbf{x}_{\tau-1}, \xi_\tau) - (\nabla g(\mathbf{x}_\tau) - \nabla g(\mathbf{x}_{\tau-1}))) \quad (22)$$

$$+ \beta_\tau \prod_{k=\tau+1}^t (1 - \beta_k) (\nabla \tilde{g}(\mathbf{x}_\tau, \xi_\tau) - \nabla g(\mathbf{x}_\tau)) \quad (23)$$

for  $\tau > 1$ . Recall that  $\mathbf{e}_1 = \nabla \tilde{g}(\mathbf{x}_1, \xi_1) - \nabla g(\mathbf{x}_1)$ . We observe that  $\mathbb{E}[\zeta_\tau | \mathcal{F}_{\tau-1}] = 0$  where  $\mathcal{F}_{\tau-1}$  is the  $\sigma$ -field generated by  $\{\mathbf{x}_1, \xi_1, \dots, \mathbf{x}_{\tau-1}, \xi_{\tau-1}\}$ . Therefore,  $\{\zeta_\tau\}_{\tau=1}^t$  is a martingale difference sequence.

Next, we derive upper bounds of  $\|\zeta_\tau\|$ . To begin with, we observe that for any  $\tau = 1, 2, \dots, t$ ,

$$\prod_{k=\tau}^t (1 - \beta_k) = \prod_{k=\tau}^t \left(1 - \frac{1}{(k+1)^\omega}\right) = \prod_{k=\tau}^t \frac{(k+1)^\omega - 1}{(k+1)^\omega} \leq \prod_{k=\tau}^t \frac{k^\alpha}{(k+1)^\omega} = \frac{\tau^\omega}{(t+1)^\omega}, \quad (24)$$

where we used the fact that  $(k+1)^\omega - 1 \leq k^\omega$  in the last inequality. By using the above inequality, we can bound  $\|\zeta_1\|$  as follows:

$$\|\zeta_1\| = \prod_{k=2}^t (1 - \beta_k) \|\mathbf{e}_1\| \leq \frac{2^\omega}{(t+1)^\omega} \|\nabla \tilde{g}(\mathbf{x}_1, \xi_1) - \nabla g(\mathbf{x}_1)\| = \frac{2^\omega \sigma_1}{(t+1)^\omega} \frac{\|\nabla \tilde{g}(\mathbf{x}_1, \xi_1) - \nabla g(\mathbf{x}_1)\|}{\sigma_1}.$$

Define  $c_1 = \frac{2^\omega \sigma_g}{(T+1)^\omega}$ , then by Assumption 2.3(ii) we have  $\mathbb{E}[\exp(\|\zeta_1\|^2/c_1^2)] \leq \exp(1)$ . Moreover, for  $\tau > 1$ , by triangle inequality,  $\|\zeta_\tau\|$  can be bounded by

$$\begin{aligned} \|\zeta_\tau\| &\leq \prod_{k=\tau}^t (1 - \beta_k) (\|\nabla \tilde{g}(\mathbf{x}_\tau, \xi_\tau) - \nabla \tilde{g}(\mathbf{x}_{\tau-1}, \xi_\tau)\| + \|\nabla g(\mathbf{x}_\tau) - \nabla g(\mathbf{x}_{\tau-1})\|) \\ &\quad + \beta_\tau \prod_{k=\tau+1}^t (1 - \beta_k) \|\nabla \tilde{g}(\mathbf{x}_\tau, \xi_\tau) - \nabla g(\mathbf{x}_\tau)\| \\ &\leq 2L_g \|\mathbf{x}_\tau - \mathbf{x}_{\tau-1}\| \prod_{k=\tau}^t (1 - \beta_k) + \|\nabla \tilde{g}(\mathbf{x}_\tau, \xi_\tau) - \nabla g(\mathbf{x}_\tau)\| \beta_\tau \prod_{k=\tau+1}^t (1 - \beta_k) \\ &= 2L_g \gamma_\tau D \prod_{k=\tau}^t (1 - \beta_k) + \|\nabla \tilde{g}(\mathbf{x}_\tau, \xi_\tau) - \nabla g(\mathbf{x}_\tau)\| \beta_\tau \prod_{k=\tau+1}^t (1 - \beta_k) \\ &\leq 2L_g D \beta_\tau \prod_{k=\tau}^t (1 - \beta_k) + \frac{3^\omega}{3^\omega - 1} \|\nabla \tilde{g}(\mathbf{x}_\tau, \xi_\tau) - \nabla g(\mathbf{x}_\tau)\| \beta_\tau \prod_{k=\tau}^t (1 - \beta_k) \\ &= \left(2L_g D + \frac{3^\omega}{3^\omega - 1} \|\nabla \tilde{g}(\mathbf{x}_\tau, \xi_\tau) - \nabla g(\mathbf{x}_\tau)\|\right) \beta_\tau \prod_{k=\tau}^t (1 - \beta_k) \\ &= \left(2L_g D + \frac{3^\omega \sigma_g}{3^\omega - 1} \frac{\|\nabla \tilde{g}(\mathbf{x}_\tau, \xi_\tau) - \nabla g(\mathbf{x}_\tau)\|}{\sigma_g}\right) \beta_\tau \prod_{k=\tau}^t (1 - \beta_k) \end{aligned} \quad (25)$$

Define  $c_\tau = (2L_g D + \frac{3^\omega \sigma_g}{3^\omega - 1}) \beta_\tau \prod_{k=\tau}^t (1 - \beta_k)$ . Note that if we have  $\mathbb{E}[\exp(X_1^2/c_1^2)] \leq 1$  and  $\mathbb{E}[\exp(X_2^2/c_2^2)] \leq 1$ , then we have  $\mathbb{E}[\exp((X_1 + X_2)^2/(c_1 + c_2)^2)] \leq 1$  [39]. Thus, we have  $\mathbb{E}[\exp(\|\zeta_\tau\|^2/c_\tau^2)] \leq \exp(1)$  for all  $1 \leq \tau \leq t$ . Hence by proposition E.2, with probability  $1 - \delta'$

$$\|\mathbf{e}_t\| \leq c \cdot \sqrt{\sum_{\tau=1}^t c_\tau^2 \log \frac{2d}{\delta'}} \quad (26)$$

500 where  $c$  is an absolute constant,  $d$  is the number of dimension, and  $\sum_{\tau=1}^T c_\tau^2$  can be bounded by  
 501 Lemma B.1 as follows,

$$\begin{aligned}
 \sum_{\tau=1}^t c_\tau^2 &= c_1^2 + \sum_{\tau=2}^t c_\tau^2 = \frac{2^{2\omega} \sigma_g^2}{(T+1)^{2\omega}} + (2L_g D + \frac{3^\omega}{3^\omega - 1} \sigma_g)^2 \sum_{\tau=2}^T (\beta_\tau \prod_{k=\tau}^T (1 - \beta_k))^2 \\
 &\leq \frac{2^{2\omega} \sigma_g^2}{(T+1)^{2\omega}} + \frac{(2L_g D + \frac{3^\omega}{3^\omega - 1} \sigma_g)^2}{(t+1)^\omega} \\
 &\leq \frac{((\sqrt{2})^\omega \sigma_g)^2}{(t+1)^\omega} + \frac{(2L_g D + \frac{3^\omega}{3^\omega - 1} \sigma_g)^2}{(t+1)^\omega} \\
 &\leq \frac{2(2L_g D + \frac{3^\omega}{3^\omega - 1} \sigma_g)^2}{(t+1)^\omega}
 \end{aligned} \tag{27}$$

502 where the last inequality follows from the fact that  $(\sqrt{2})^\omega \leq 3^\omega / (3^\omega - 1)$  for any  $\omega \in (0, 1]$ .  
 503 Combining (26) and (27), we have with probability at least  $1 - \delta'$ ,

$$\|\nabla g(\mathbf{x}_t) - \widehat{\nabla g}_t\| \leq c\sqrt{2}(2L_g D + \frac{3^\omega}{3^\omega - 1} \sigma_g)(t+1)^{-\omega/2} \sqrt{\log(2d/\delta')} \stackrel{\text{def}}{=} K_{1,t} \tag{28}$$

504 Similarly with probability at least  $1 - \delta'$ ,

$$|g(\mathbf{x}_t) - \hat{g}_t| \leq c\sqrt{2}(2L_l D + \frac{3^\omega}{3^\omega - 1} \sigma_l)(t+1)^{-\omega/2} \sqrt{\log(2d/\delta')} \stackrel{\text{def}}{=} K_{0,t} \tag{29}$$

505 and with probability at least  $1 - \delta'$ ,

$$\|\nabla f(\mathbf{x}_t) - \widehat{\nabla f}_t\| \leq c\sqrt{2}(2L_f D + \frac{3^\omega}{3^\omega - 1} \sigma_f)(t+1)^{-\omega/2} \sqrt{\log(2d/\delta')} \stackrel{\text{def}}{=} K_{2,t} \tag{30}$$

506 where  $c$  is an absolute constant and  $d$  is the dimension of vectors. We can use union bound to obtain  
 507 that these three inequalities hold for at least probability  $1 - 3\delta' = 1 - \delta$ . For simplicity, we define  
 508 constant  $A_1^\alpha$  and  $A_0^\alpha$  such that,

$$A_1^\alpha (t+1)^{-\omega/2} \sqrt{\log(6d/\delta)} = K_{1,t} \quad \text{and} \quad A_0^\alpha (t+1)^{-\omega/2} \sqrt{\log(6d/\delta)} = K_{0,t} \tag{31}$$

509 and similarly  $A_2^\alpha (t+1)^{-\omega/2} \sqrt{\log(6d/\delta)} = K_{2,t}$ .  $\square$

## 510 B.2 Proof of Lemma 4.3

511 *Proof.* When  $t = \lfloor t/q \rfloor q$ , we have  $\widehat{\nabla g}_t = \nabla g(\mathbf{x}_t)$ , since we take the full batch.

512 When  $t \neq \lfloor t/q \rfloor q$ , set  $t_0 = \lfloor t/q \rfloor q$ , and

$$\epsilon_{j,i} = \frac{1}{S} (\nabla g_{S(i)}(\mathbf{x}_j) - \nabla g_{S(i)}(\mathbf{x}_{j-1}) - \nabla g(\mathbf{x}_j) + \nabla g(\mathbf{x}_{j-1})) \tag{32}$$

513 where  $i$  is the index with  $S(i)$  denoting the  $i$ -th random component function selected at iteration  $t$ .

514 Furthermore, from the update rule, we have  $\|\mathbf{x}_j - \mathbf{x}_{j-1}\| = \gamma_j \|\mathbf{s}_{j-1} - \mathbf{x}_{j-1}\| \leq D\gamma$ . And we have,

$$\begin{aligned}
 \|\epsilon_{j,i}\| &\leq \frac{1}{S} (\|\nabla g_i(\mathbf{x}_j) - \nabla g_i(\mathbf{x}_{j-1})\| + \|\nabla g(\mathbf{x}_j) - \nabla g(\mathbf{x}_{j-1})\|) \\
 &\leq \frac{2L_g}{S} \|\mathbf{x}_j - \mathbf{x}_{j-1}\| \leq \frac{2L_g D \gamma}{S}
 \end{aligned} \tag{33}$$

515 for all  $t_0 \leq j \leq t$  and  $1 \leq i \leq S$ . On the other hand, we have,

$$\begin{aligned}
 \|\widehat{\nabla g}_t - \nabla g(\mathbf{x}_t)\| &= \|\nabla g_S(\mathbf{x}_t) - \nabla g_S(\mathbf{x}_{t_0}) - \nabla g(\mathbf{x}_t) + \nabla g(\mathbf{x}_{t_0}) + (\nabla g_{t_0} - \nabla g(\mathbf{x}_{t_0}))\| \\
 &= \left\| \sum_{j=t_0+1}^t (\nabla g_S(\mathbf{x}_j) - \nabla g_S(\mathbf{x}_{j-1}) - \nabla g(\mathbf{x}_j) + \nabla g(\mathbf{x}_{j-1})) \right. \\
 &\quad \left. + (\nabla g_{S_1}(\mathbf{x}_{t_0}) - \nabla g(\mathbf{x}_{t_0})) \right\| \\
 &= \left\| \sum_{j=t_0+1}^t \sum_{i=1}^S \epsilon_{j,i} + \sum_{i=1}^S \epsilon_{t_0,i} \right\| = \left\| \sum_{j=t_0+1}^t \sum_{i=1}^S \epsilon_{j,i} \right\|
 \end{aligned} \tag{34}$$

516 Then by Proposition [E.1](#), we have

$$\mathbb{P}(\|\widehat{\nabla}g_t - \nabla g(\mathbf{x}_t)\| \geq \lambda) \leq 4 \exp\left(-\frac{\lambda^2}{4S(t-t_0)\frac{4L_g^2 D^2 \gamma^2}{S^2}}\right) \leq 4 \exp\left(-\frac{\lambda^2}{16L_g^2 D^2 \gamma^2}\right) \quad (35)$$

517 where the last inequality follows from the fact  $S = \sqrt{n}$  and  $t - t_0 \leq q = \sqrt{n}$ . By setting  
 518  $\lambda = (4L_g D \gamma \sqrt{\log(4/\delta')})$  for some  $\delta' \in (0, 1)$ , we have with probability at least  $1 - \delta'$ ,

$$\|\widehat{\nabla}g_t - \nabla g(\mathbf{x}_t)\| \leq 4L_g D \gamma \sqrt{\log(4/\delta')} \quad (36)$$

519 Similarly, with probability at least  $1 - \delta'$ ,

$$\|\hat{g}_t - g(\mathbf{x}_t)\| \leq 4L_l D \gamma \sqrt{\log(4/\delta')} \quad (37)$$

520 and with probability  $1 - \delta'$ ,

$$\|\widehat{\nabla}f_t - \nabla f(\mathbf{x}_t)\| \leq 4L_f D \gamma \sqrt{\log(4/\delta')} \quad (38)$$

521 Then by union bound and  $\delta = 3\delta'$ , we show these three equalities hold with probability  $1 - \delta$ .

522 □

### 523 B.3 Proof of Lemma [4.2](#)

524 *Proof.* Let  $\mathbf{x}_g^*$  be any point in  $\mathcal{X}_g^*$ , i.e., any optimal solution of the lower-level problem. By definition,  
 525 we have  $g(\mathbf{x}_g^*) = g^*$ . Since  $g$  is convex and  $g^* \leq g(\mathbf{x}_0)$ , we have

$$g(\mathbf{x}_0) - g(\mathbf{x}_t) \geq g^* - g(\mathbf{x}_t) = g(\mathbf{x}_g^*) - g(\mathbf{x}_t) \geq \langle \nabla g(\mathbf{x}_t), \mathbf{x}_g^* - \mathbf{x}_t \rangle \quad (39)$$

526 Add and subtract terms in (47), we have,

$$\langle \widehat{\nabla}g_t, \mathbf{x}_g^* - \mathbf{x}_t \rangle + \hat{g}_t - g(\mathbf{x}_0) \leq |\langle \widehat{\nabla}g_t - \nabla g(\mathbf{x}_t), \mathbf{x}_g^* - \mathbf{x}_t \rangle| + |\hat{g}_t - g(\mathbf{x}_t)| \quad (40)$$

527 Considering the random hyperplane we used in [\(9\)](#), we want to prove the following inequality holds  
 528 with high probability,

$$\langle \widehat{\nabla}g_t, \mathbf{x}_g^* - \mathbf{x}_t \rangle + \hat{g}_t - g(\mathbf{x}_0) \leq K_t \quad (41)$$

529 Recall  $K_t = K_{0,t} + DK_{1,t}$ . And  $K_{0,t}$  and  $K_{1,t}$  were set as the high probability bounds of  $\|\widehat{\nabla}g_t - \nabla g(\mathbf{x}_t)\|$   
 530 and  $|\hat{g}_t - g(\mathbf{x}_t)|$  in Lemma [4.1](#) for Algorithm [1](#) or Lemma [4.3](#) for Algorithm [2](#). Then  
 531 compare the two inequalities above and use Jensen's inequality,  $|\langle \widehat{\nabla}g_t, \mathbf{x}_g^* - \mathbf{x}_t \rangle| + |\hat{g}_t - g(\mathbf{x}_0)| \leq K_t$   
 532 holds with high probability  $1 - \delta$  for all  $t \geq 0$ . Hence, Lemma [4.2](#) holds with probability  $1 - \delta$  for  
 533 all  $t \geq 0$ . □

### 534 B.4 Improvement in one step

535 The following lemma characterizes the improvement of both the upper-level and lower-level objective  
 536 values after one step of the algorithms.

537 **Lemma B.2.** *If Assumptions [2.1](#), [2.2](#), [2.3](#) are satisfied,*

538 *(i) For all  $t \geq 0$ , assume that  $\mathcal{X}_g^* \subset \mathcal{X}_t$ . Then we have*

$$\gamma_{t+1}\mathcal{G}(\mathbf{x}_t) \leq f(\mathbf{x}_t) - f(\mathbf{x}_{t+1}) + \gamma_{t+1}D\|\nabla f(\mathbf{x}_t) - \widehat{\nabla}f_t\| + \frac{L_f D^2 \gamma_{t+1}^2}{2} \quad (42)$$

539 *As a corollary, if  $f$  is convex, we further have*

$$f(\mathbf{x}_{t+1}) - f^* \leq (1 - \gamma_{t+1})(f(\mathbf{x}_t) - f^*) + \gamma_{t+1}D\|\nabla f(\mathbf{x}_t) - \widehat{\nabla}f_t\| + \frac{L_f D^2 \gamma_{t+1}^2}{2}. \quad (43)$$

540 (ii) We have

$$g(\mathbf{x}_{t+1}) - g(\mathbf{x}_0) \leq (1 - \gamma_{t+1})(g(\mathbf{x}_t) - g(\mathbf{x}_0)) + D\gamma_{t+1}(\|\nabla g(\mathbf{x}_t) - \widehat{\nabla} g_t\| + K_{1,t}) \\ + \gamma_{t+1}(\|g(\mathbf{x}_t) - \hat{g}_t\| + K_{0,t}) + \frac{L_g D^2 \gamma_{t+1}^2}{2}. \quad (44)$$

541 *Proof.* (i) Based on the  $L_f$ -smoothness of the expected function  $f$  we show that  $f(\mathbf{x}_{t+1})$  is bounded  
542 by

$$f(\mathbf{x}_{t+1}) \leq f(\mathbf{x}_t) + \nabla f(\mathbf{x}_t)^\top (\mathbf{x}_{t+1} - \mathbf{x}_t) + \frac{L_f}{2} \|\mathbf{x}_{t+1} - \mathbf{x}_t\|^2 \quad (45)$$

543 Replace the terms  $\mathbf{x}_{t+1} - \mathbf{x}_t$  by  $\gamma_{t+1}(\mathbf{s}_t - \mathbf{x}_t)$  and add and subtract the term  $\gamma_{t+1} \widehat{\nabla} f_t^\top (\mathbf{s}_t - \mathbf{x}_t)$  to  
544 the right hand side to obtain,

$$f(\mathbf{x}_{t+1}) \leq f(\mathbf{x}_t) + \gamma_{t+1}(\nabla f(\mathbf{x}_t) - \widehat{\nabla} f_t)^\top (\mathbf{s}_t - \mathbf{x}_t) + \gamma_{t+1} \widehat{\nabla} f_t^\top (\mathbf{s}_t - \mathbf{x}_t) + \frac{L_f}{2} \|\mathbf{x}_{t+1} - \mathbf{x}_t\|^2 \quad (46)$$

545 By Lemma 4.2,  $\mathcal{X}_g^* \subseteq \mathcal{X}_t$  with high probability  $1 - \delta$ , for all  $t = 1, \dots, T$ . Note that if we define  
546  $\mathbf{s}'_t = \arg \max_{\mathbf{s} \in \mathcal{X}_t} \{\langle \nabla f(\mathbf{x}_t), \mathbf{x}_t - \mathbf{s} \rangle\}$ . Recall that FW gap is  $\mathcal{G}(\hat{\mathbf{x}}) = \max_{\mathbf{s} \in \mathcal{X}_g^*} \{\langle \nabla f(\hat{\mathbf{x}}), \hat{\mathbf{x}} - \mathbf{s} \rangle\}$ .

547 We can replace the inner product  $\langle \widehat{\nabla} f_t, \mathbf{s}_t \rangle$  by its upper bound  $\langle \widehat{\nabla} f_t, \mathbf{s}'_t \rangle$ . Applying this substitution  
548 leads to

$$f(\mathbf{x}_{t+1}) \leq f(\mathbf{x}_t) + \gamma_{t+1}(\nabla f(\mathbf{x}_t) - \widehat{\nabla} f_t)^\top (\mathbf{s}_t - \mathbf{x}_t) + \gamma_{t+1} \widehat{\nabla} f_t^\top (\mathbf{s}'_t - \mathbf{x}_t) + \frac{L_f}{2} \|\mathbf{x}_{t+1} - \mathbf{x}_t\|^2 \\ = f(\mathbf{x}_t) + \gamma_{t+1}(\nabla f(\mathbf{x}_t) - \widehat{\nabla} f_t)^\top (\mathbf{s}_t - \mathbf{x}_t) + \gamma_{t+1}(\widehat{\nabla} f_t - \nabla f(\mathbf{x}_t))^\top (\mathbf{s}'_t - \mathbf{x}_t) \\ - \gamma_{t+1} \nabla f(\mathbf{x}_t)^\top (\mathbf{x}_t - \mathbf{s}'_t) + \frac{L_f}{2} \|\mathbf{x}_{t+1} - \mathbf{x}_t\|^2 \\ \leq f(\mathbf{x}_t) + \gamma_{t+1}(\nabla f(\mathbf{x}_t) - \widehat{\nabla} f_t)^\top (\mathbf{s}_t - \mathbf{s}'_t) - \gamma_{t+1} \mathcal{G}(\mathbf{x}_t) + \frac{L_f}{2} \|\mathbf{x}_{t+1} - \mathbf{x}_t\|^2 \\ \leq f(\mathbf{x}_t) + \gamma_{t+1} D \|\nabla f(\mathbf{x}_t) - \widehat{\nabla} f_t\| - \gamma_{t+1} \mathcal{G}(\mathbf{x}_t) + \frac{L_f \gamma_{t+1}^2 D^2}{2} \quad (47)$$

549 Rearrange the terms for the inequality above, we can obtain,

$$\gamma_{t+1} \mathcal{G}(\mathbf{x}_t) \leq f(\mathbf{x}_t) - f(\mathbf{x}_{t+1}) + \gamma_{t+1} D \|\nabla f(\mathbf{x}_t) - \widehat{\nabla} f_t\| + \frac{L_f \gamma_{t+1}^2 D^2}{2} \quad (48)$$

550 As a simple corollary, since  $\mathcal{G}(\mathbf{x}_t) \geq f(\mathbf{x}_t) - f^*$  when  $f$  is convex, we have,

$$f(\mathbf{x}_{t+1}) - f^* \leq (1 - \gamma_{t+1})(f(\mathbf{x}_t) - f^*) + \gamma_{t+1} D \|\nabla f(\mathbf{x}_t) - \widehat{\nabla} f_t\| + \frac{L_f D^2 \gamma_{t+1}^2}{2} \quad (49)$$

551 (ii) Based on the  $L_g$ -smoothness of the expected function  $g$  we show that  $g(\mathbf{x}_{t+1})$  is bounded by

$$g(\mathbf{x}_{t+1}) \leq g(\mathbf{x}_t) + \nabla g(\mathbf{x}_t)^\top (\mathbf{x}_{t+1} - \mathbf{x}_t) + \frac{L_g}{2} \|\mathbf{x}_{t+1} - \mathbf{x}_t\|^2 \quad (50)$$

552 Replace the terms  $\mathbf{x}_{t+1} - \mathbf{x}_t$  by  $\gamma_{t+1}(\mathbf{s}_t - \mathbf{x}_t)$  and add and subtract the term  $\gamma_{t+1} \widehat{\nabla} g_t^\top (\mathbf{s}_t - \mathbf{x}_t)$  to  
553 the right-hand side to obtain,

$$g(\mathbf{x}_{t+1}) \leq g(\mathbf{x}_t) + \gamma_{t+1}(\nabla g(\mathbf{x}_t) - \widehat{\nabla} g_t)^\top (\mathbf{s}_t - \mathbf{x}_t) + \gamma_{t+1} \widehat{\nabla} g_t^\top (\mathbf{s}_t - \mathbf{x}_t) + \frac{L_g}{2} \|\mathbf{x}_{t+1} - \mathbf{x}_t\|^2 \quad (51)$$

554 Now by definition of the set  $\mathcal{X}_t$ , using  $\langle \widehat{\nabla} g_t, \mathbf{s}_t - \mathbf{x}_t \rangle \leq g(\mathbf{x}_0) - \hat{g}_t + K_{0,t} + DK_{1,t}$ . In addition,  
555 we could use Cauchy-Schwarz inequality to upper bound the second term. Then add and subtract  
556  $\gamma_{t+1} g(\mathbf{x}_0)$  on the right hand side to obtain,

$$g(\mathbf{x}_{t+1}) \leq g(\mathbf{x}_t) + \gamma_{t+1}(g(\mathbf{x}_0) - g(\mathbf{x}_t)) + \gamma_{t+1} D \|\nabla g(\mathbf{x}_t) - \widehat{\nabla} g_t\| \\ + \gamma_{t+1}(g(\mathbf{x}_t) - \hat{g}_t) + \gamma_{t+1}(K_{0,t} + DK_{1,t}) + \frac{L_g}{2} \|\mathbf{x}_{t+1} - \mathbf{x}_t\|^2 \quad (52)$$

557 Then subtract  $g(\mathbf{x}_0)$  on both sides,

$$g(\mathbf{x}_{t+1}) - g(\mathbf{x}_0) \leq (1 - \gamma_{t+1})(g(\mathbf{x}_t) - g(\mathbf{x}_0)) \\ + \gamma_{t+1}(D \|\nabla g(\mathbf{x}_t) - \widehat{\nabla} g_t\| + \|g(\mathbf{x}_t) - \hat{g}_t\| + K_{0,t} + DK_{1,t}) + \frac{L_g}{2} \|\mathbf{x}_{t+1} - \mathbf{x}_t\|^2 \quad (53)$$

558 and the claim in the lemma follows.  $\square$

## 559 C Proof of Theorem for Algorithm 1

### 560 C.1 Proof of Theorem 4.4

561 *Proof.* For **lower-level**, by Lemma B.2 we have

$$\begin{aligned} g(\mathbf{x}_{t+1}) - g(\mathbf{x}_0) &\leq (1 - \gamma_{t+1})(g(\mathbf{x}_t) - g(\mathbf{x}_0)) + D\gamma_{t+1}(\|\nabla g(\mathbf{x}_t) - \widehat{\nabla} g_t\| + K_{1,t}) \\ &\quad + \gamma_{t+1}(\|g(x_t) - \hat{g}_t\| + K_{0,t}) + \frac{L_g D^2 \gamma_{t+1}^2}{2} \end{aligned} \quad (54)$$

562 By Lemma 4.1, we have  $\|\nabla g(\mathbf{x}_t) - \widehat{\nabla} g_t\| \leq K_{1,t}$  and  $\|g(x_t) - \hat{g}_t\| \leq K_{0,t}$  with probability  $1 - \delta'$ .  
563 Plug them in the inequality above to obtain,

$$\begin{aligned} g(\mathbf{x}_{t+1}) - g(\mathbf{x}_0) &\leq (1 - \gamma_{t+1})(g(\mathbf{x}_t) - g(\mathbf{x}_0)) + 2\gamma_{t+1}(DK_{1,t} + K_{0,t}) + \frac{L_g D^2 \gamma_{t+1}^2}{2} \\ &\leq (1 - \frac{1}{t+1})g(\mathbf{x}_t) - g(\mathbf{x}_0) \\ &\quad + \frac{2(DA_1^1 \sqrt{\log(6d/\delta')} + A_0^1 \sqrt{\log(6/\delta')})}{(t+1)^{3/2}} + \frac{L_g D^2}{2(t+1)^2} \end{aligned} \quad (55)$$

564 with probability  $1 - \delta'$  for all  $t$ . Let  $C_1 = 4(DA_1^1 + A_0^1)$  and  $\delta = t\delta'$ . Then we can sum all the  
565 inequality up for all  $t$  to obtain,

$$\begin{aligned} g(\mathbf{x}_{t+1}) - g(\mathbf{x}_0) &\leq (1 - \frac{1}{t+1})g(\mathbf{x}_t) - g(\mathbf{x}_0) + \frac{C_1/2\sqrt{\log(6d/\delta')}}{(t+1)^{3/2}} + \frac{L_g D^2}{2(t+1)^2} \\ &= \prod_{i=1}^t (1 - \frac{1}{i+1})(g(\mathbf{x}_0) - g(\mathbf{x}_0)) + \sum_{k=1}^t \frac{C_1/2\sqrt{\log(6d/\delta')}}{(k+1)^{3/2}} \prod_{i=k+1}^t (1 - \frac{1}{i+1}) \\ &\quad + \sum_{k=1}^t \frac{L_g D^2}{2(k+1)^2} \prod_{i=k+1}^t (1 - \frac{1}{i+1}) \\ &\leq 0 + \frac{C_1/2\sqrt{\log(6d/\delta')}}{t+1} \sum_{k=1}^t \frac{1}{\sqrt{k+1}} + \frac{L_g D^2}{2(t+1)} \sum_{k=1}^t \frac{1}{k+1} \\ &\leq \frac{C_1\sqrt{\log(6d/\delta')}}{\sqrt{t+1}} + \frac{L_g D^2}{2(t+1)}(1 + \log t) \\ &\leq \frac{C_1\sqrt{\log(6td/\delta')}}{\sqrt{t+1}} + \frac{L_g D^2 \log t}{t+1} \end{aligned} \quad (56)$$

566 with probability  $1 - \delta$ .

567 For **upper-level**, by Lemma B.2 we have

$$f(\mathbf{x}_{t+1}) - f^* \leq (1 - \gamma_{t+1})(f(\mathbf{x}_t) - f^*) + D\gamma_{t+1}(\|\nabla f(\mathbf{x}_t) - \widehat{\nabla} f_t\|) + \frac{L_g D^2 \gamma_{t+1}^2}{2} \quad (57)$$

568 By Lemma 4.1, we have  $\|\nabla f(\mathbf{x}_t) - \widehat{\nabla} f_t\| \leq \frac{A_2^1 \sqrt{\log(6d/\delta')}}{(t+1)^{1/2}}$  with probability  $1 - \delta'$ . Plug it in the  
569 inequality above to obtain,

$$f(\mathbf{x}_{t+1}) - f^* \leq (1 - \frac{1}{t+1})(f(\mathbf{x}_t) - f^*) + \frac{DA_2^1 \sqrt{\log(6d/\delta')}}{(t+1)^{3/2}} + \frac{L_g D^2}{2(t+1)^2} \quad (58)$$

570 with probability  $1 - \delta'$  for all  $t$ . Then we can sum all the inequality up for all  $t$  to obtain,

$$\begin{aligned}
f(\mathbf{x}_{t+1}) - f^* &\leq \left(1 - \frac{1}{t+1}\right)(f(\mathbf{x}_t) - f^*) + \frac{DA_2^1 \sqrt{\log(6d/\delta')}}{(t+1)^{3/2}} + \frac{L_g D^2}{2(t+1)^2} \\
&= \prod_{i=1}^t \left(1 - \frac{1}{i+1}\right)(f(\mathbf{x}_0) - f^*) + \sum_{k=1}^t \frac{DA_2^1 \sqrt{\log(6d/\delta')}}{(k+1)^{3/2}} \prod_{i=k+1}^t \left(1 - \frac{1}{i+1}\right) \\
&\quad + \sum_{k=1}^T \frac{L_g D^2}{2(k+1)^2} \prod_{i=k+1}^T \left(1 - \frac{1}{i+1}\right) \\
&\leq \frac{f(\mathbf{x}_0) - f^*}{t+1} + \frac{DA_2^1 \sqrt{\log(d/\delta')}}{t+1} \sum_{k=1}^T \frac{1}{\sqrt{k+1}} + \frac{L_g D^2}{2(t+1)} \sum_{k=1}^T \frac{1}{k+1} \\
&\leq \frac{f(\mathbf{x}_0) - f^*}{t+1} + \frac{2DA_2^1 \sqrt{\log(6d/\delta')}}{\sqrt{t+1}} + \frac{L_g D^2}{2(t+1)}(1 + \log t) \\
&\leq \frac{f(\mathbf{x}_0) - f^*}{t+1} + \frac{2DA_2^1 \sqrt{\log(6td/\delta)}}{\sqrt{t+1}} + \frac{L_g D^2 \log t}{(t+1)}
\end{aligned} \tag{59}$$

571 with probability  $1 - \delta = 1 - t\delta'$ . Let  $C_2 = 2DA_2^1$ . The theorem is obtained.

572

□

## 573 C.2 Proof of Theorem 4.5

574 *Proof.* For **lower-level**, by Lemma B.2 we have

$$\begin{aligned}
g(\mathbf{x}_{t+1}) - g(\mathbf{x}_0) &\leq (1 - \gamma_{t+1})(g(\mathbf{x}_t) - g(\mathbf{x}_0)) + D\gamma_{t+1}(\|\nabla g(\mathbf{x}_t) - \widehat{\nabla} g_t\| + K_{1,t}) \\
&\quad + \gamma_{t+1}(\|g(x_t) - \hat{g}_t\| + K_{0,t}) + \frac{L_g D^2 \gamma_{t+1}^2}{2}
\end{aligned} \tag{60}$$

575 By Lemma 4.1 we have  $\|\nabla g(\mathbf{x}_t) - \widehat{\nabla} g_t\| \leq K_{1,t}$  and  $\|g(x_t) - \hat{g}_t\| \leq K_{0,t}$  with probability  $1 - \delta'$ .  
576 Plug them in the inequality above to obtain,

$$\begin{aligned}
g(\mathbf{x}_{t+1}) - g(\mathbf{x}_0) &\leq (1 - \gamma_{t+1})(g(\mathbf{x}_t) - g(\mathbf{x}_0)) + 2\gamma_{T+1}(DK_{1,t} + K_{0,t}) + \frac{L_g D^2 \gamma_{t+1}^2}{2} \\
&\leq \left(1 - \frac{1}{(T+1)^{2/3}}\right)(g(\mathbf{x}_t) - g(\mathbf{x}_0)) \\
&\quad + \frac{2D(A_1^{2/3} \sqrt{\log(6d/\delta')} + A_0^{2/3} \sqrt{\log(6d/\delta')})}{(t+1)^{1/3}(T+1)^{2/3}} + \frac{L_g D^2}{2(T+1)^{4/3}}
\end{aligned} \tag{61}$$

577 with probability  $1 - \delta'$  for all  $t$ . Let  $C_3 = 2(DA_1^{2/3} + A_0^{2/3})$ . Then we can sum all the inequality up  
578 for all  $t$  to obtain,

$$\begin{aligned}
g(\mathbf{x}_{t+1}) - g(\mathbf{x}_0) &\leq \left(1 - \frac{1}{(T+1)^{2/3}}\right)(g(\mathbf{x}_t) - g(\mathbf{x}_0)) + \frac{C_3 \sqrt{\log(6d/\delta')}}{(t+1)^{1/3}(T+1)^{2/3}} + \frac{L_g D^2}{2(T+1)^{4/3}} \\
&\leq \left(1 - \frac{1}{(T+1)^{2/3}}\right)(g(\mathbf{x}_t) - g(\mathbf{x}_0)) + \frac{C_3 \sqrt{\log(6Td/\delta)} + L_g D^2/2}{(t+1)^{1/3}(T+1)^{2/3}}
\end{aligned} \tag{62}$$

579 By induction, we have for all  $t \geq 1$ ,

$$g(\mathbf{x}_{t+1}) - g(\mathbf{x}_0) \leq \frac{C_3 \sqrt{\log(6Td/\delta)} + L_g D^2/2}{(T+1)^{1/3}} \tag{63}$$

580 with probability  $1 - \delta$ , where  $\delta = T\delta'$ .

581 For **upper-level**, by Lemma B.2 we have

$$\gamma_{t+1} \mathcal{G}(\mathbf{x}_t) \leq f(\mathbf{x}_t) - f(\mathbf{x}_{t+1}) + \gamma_{t+1} D \|\nabla f(\mathbf{x}_t) - \widehat{\nabla} f_t\| + \frac{L_f \gamma_{t+1}^2 D^2}{2} \tag{64}$$



By Lemma 4.1, we have  $\|\nabla f(\mathbf{x}_t) - \widehat{\nabla} f_t\| \leq \frac{A_2^{2/3} \sqrt{\log(6d/\delta')}}{(t+1)^{1/3}}$  with probability  $1 - \delta'$ . Plug it and  $\gamma_{t+1} = 1/(T+1)^{2/3}$  in inequality above to obtain,

$$\begin{aligned} \sum_{t=0}^{T-1} \gamma_{t+1} \mathcal{G}(\mathbf{x}_t) &\leq f(\mathbf{x}_0) - f(\mathbf{x}_T) + D \sum_{t=0}^{T-1} \gamma_{t+1} \|\nabla f(\mathbf{x}_t) - \widehat{\nabla} f_t\| + \frac{L_f D^2}{2} \sum_{t=0}^{T-1} \gamma_{t+1}^2 \\ &\leq f(\mathbf{x}_0) - f(\mathbf{x}_T) + D \sum_{t=0}^{T-1} \frac{A_2^{2/3} \sqrt{\log(6d/\delta')}}{(t+1)^{1/3} (T+1)^{2/3}} + \frac{L_f D^2}{2} \sum_{t=0}^{T-1} \frac{1}{(T+1)^{4/3}} \quad (65) \\ &\leq f(\mathbf{x}_0) - f(\mathbf{x}_T) + \frac{3}{2} D A_2^{2/3} \sqrt{\log(6d/\delta')} + \frac{L_f D^2}{2} \frac{1}{(T+1)^{1/3}} \end{aligned}$$

Let  $t^* = \arg \min_{1 \leq t \leq T} \mathcal{G}(\mathbf{x}_t)$ , then

$$\begin{aligned} \mathcal{G}(\mathbf{x}_{t^*}) &\leq \frac{1}{\sum_{t=0}^{T-1} \gamma_{t+1}} \sum_{t=0}^{T-1} \gamma_{t+1} \mathcal{G}(\mathbf{x}_t) \\ &\leq \frac{1}{(T+1)^{1/3}} (f(\mathbf{x}_0) - f(\mathbf{x}_T) + \frac{3}{2} D A_2^{2/3} \sqrt{\log(6Td/\delta)} + \frac{L_f D^2}{2} \frac{1}{(T+1)^{1/3}}) \quad (66) \\ &\leq \frac{1}{(T+1)^{1/3}} (f(\mathbf{x}_0) - \underline{f} + \frac{3}{2} D A_2^{2/3} \sqrt{\log(6Td/\delta)} + \frac{L_f D^2}{2} \frac{1}{(T+1)^{1/3}}) \end{aligned}$$

with probability  $1 - \delta$ , where  $\delta = T\delta'$ . By letting  $C_4 = \frac{3}{2} D A_2^{2/3}$ , the theorem is obtained.  $\square$

## D Proof of Theorem for Algorithm 2

### D.1 Proof of Theorem 4.6

*Proof.* For **lower-level** By Lemma B.2, we have

$$\begin{aligned} g(\mathbf{x}_{t+1}) - g(\mathbf{x}_0) &\leq (1 - \gamma_{t+1})(g(\mathbf{x}_t) - g(\mathbf{x}_0)) + D\gamma_{t+1}(\|\nabla g(\mathbf{x}_t) - \widehat{\nabla} g_t\| + K_{1,t}) \\ &\quad + \gamma_{t+1}(\|g(\mathbf{x}_t) - \hat{g}_t\| + K_{0,t}) + \frac{L_g D^2 \gamma_{t+1}^2}{2} \quad (67) \end{aligned}$$

By Lemma 4.3, we have  $\|\nabla g(\mathbf{x}_t) - \widehat{\nabla} g_t\| \leq 4L_g D \gamma \sqrt{\log(12/\delta')}$  and  $\|g(\mathbf{x}_t) - \hat{g}_t\| \leq 4L_l D \gamma \sqrt{\log(12/\delta')}$  with probability  $1 - \delta'$ . Let  $C_5 = 8D(DL_g + L_l)$  and  $\delta = T\delta'$ . Plug them in inequality above and let  $\gamma_t = \gamma = \log T/T$  to obtain,

$$g(\mathbf{x}_{T+1}) - g(\mathbf{x}_0) \leq (1 - \gamma)(g(\mathbf{x}_T) - g(\mathbf{x}_0)) + (C_5 \sqrt{\log(12/\delta')} + L_g D^2/2) \gamma^2 \quad (68)$$

with probability  $1 - \delta/T$ . Sum up the inequalities for all  $1 \leq t \leq T$  to get,

$$\begin{aligned} g(\mathbf{x}_{T+1}) - g(\mathbf{x}_0) &= (1 - \gamma)^T (g(\mathbf{x}_0) - g(\mathbf{x}_0)) + (C_5 \sqrt{\log(12/\delta')} + L_g D^2/2) \gamma^2 \sum_{k=1}^T (1 - \gamma)^k \\ &\leq 0 + (C_5 \sqrt{\log(12/\delta')} + L_g D^2/2) \gamma \leq \frac{(C_5 \sqrt{\log(12T/\delta)} + L_g D^2/2) \log T}{T} \quad (69) \end{aligned}$$

with probability  $1 - \delta$ .

For **upper-level**, by Lemma B.2, we have,

$$f(\mathbf{x}_T) - f^* \leq (1 - \gamma_T) f(\mathbf{x}_{T-1}) - f^* + D\gamma_T \|\nabla f(\mathbf{x}_{T-1}) - \widehat{\nabla} f_{T-1}\| + \frac{L_f D^2 \gamma_T^2}{2} \quad (70)$$

Now we proceed by replacing the terms  $\|\nabla f(\mathbf{x}_t) - \widehat{\nabla} f_t\|$  by its upper bounds from Lemma 4.3, i.e.  $\|\nabla f(\mathbf{x}_t) - \widehat{\nabla} f_t\| \leq 4L_f D \gamma \sqrt{\log(12/\delta')}$ ,

$$f(\mathbf{x}_T) - f^* \leq (1 - \gamma)(f(\mathbf{x}_{T-1}) - f^*) + L_f D^2 \gamma^2 (4\sqrt{\log(12/\delta')} + 1/2) \quad (71)$$

597 with probability  $(1 - \delta')$ . And we can choose  $\delta = 3T\delta'$ . Then by telescope, with  $\gamma = \frac{\log T}{T}$ , we can  
 598 obtain,

$$\begin{aligned}
 f(\mathbf{x}_T) - f^* &\leq (1 - \gamma)^T (f(\mathbf{x}_0) - f^*) + (4\sqrt{\log(12/\delta')} + 1/2)L_f D^2 \gamma^2 \sum_{i=1}^T (1 - \gamma)^i \\
 &\leq (1 - \gamma)^T (f(\mathbf{x}_0) - f^*) + (4\sqrt{\log(12/\delta')} + 1/2)L_f D^2 \gamma \\
 &\leq \exp(-\gamma T) (f(\mathbf{x}_0) - f^*) + (4\sqrt{\log(12/\delta')} + 1/2)L_f D^2 \gamma \\
 &\leq (f(\mathbf{x}_0) - f^*)/T + (4\sqrt{\log(12T/\delta)} + 1/2)L_f D^2 \log T/T
 \end{aligned} \tag{72}$$

599 with probability  $1 - \delta$ . Note that without loss of generality, we can assume  $f(\mathbf{x}_0) - f^* \geq 0$ . If it is  
 600 less than 0, we can bound it by 0. By letting  $C_6 = 5L_f D^2$ , the theorem is obtained.

601

□

## 602 D.2 Proof of Theorem 4.7

603 *Proof.* For **lower-level**, by Lemma B.2, we have

$$\begin{aligned}
 g(\mathbf{x}_{t+1}) - g(\mathbf{x}_0) &\leq (1 - \gamma_{t+1})(g(\mathbf{x}_t) - g(\mathbf{x}_0)) + D\gamma_{t+1}(\|\nabla g(\mathbf{x}_t) - \widehat{\nabla} g_t\| + K_{1,t}) \\
 &\quad + \gamma_{t+1}(\|g(x_t) - \hat{g}_t\| + K_{0,t}) + \frac{L_g D^2 \gamma_{t+1}^2}{2}
 \end{aligned} \tag{73}$$

604 By Lemma 4.3, we have  $\|\nabla g(\mathbf{x}_t) - \widehat{\nabla} g_t\| \leq 4L_g D\gamma\sqrt{\log(12/\delta')}$  and  $\|g(x_t) - \hat{g}_t\| \leq$   
 605  $4L_t D\gamma\sqrt{\log(12/\delta')}$  with probability  $1 - \delta'$ . Let  $C_7 = 8D(DL_g + L_t)$  and  $\delta = T\delta'$ . Plug  
 606 them in inequality above and let  $\gamma_t = 1/\sqrt{T}$  to obtain,

$$\begin{aligned}
 g(\mathbf{x}_{t+1}) - g(\mathbf{x}_0) &\leq (1 - \frac{1}{T^{1/2}})(g(\mathbf{x}_t) - g(\mathbf{x}_0)) + \frac{C_7\sqrt{\log(12/\delta')}}{T} + \frac{L_g D^2}{2T} \\
 &\leq (1 - \frac{1}{T^{1/2}})(g(\mathbf{x}_t) - g(\mathbf{x}_0)) + \frac{C_7\sqrt{\log(12/\delta')} + L_g D^2/2}{T}
 \end{aligned} \tag{74}$$

607 with probability  $1 - \delta/T$ . Sum up the inequalities for all  $t \geq 1$  to get,

$$\begin{aligned}
 g(\mathbf{x}_{t+1}) - g(\mathbf{x}_0) &= (1 - \frac{1}{T^{1/2}})^t \mathbb{E}[g(\mathbf{x}_0) - g(\mathbf{x}_0)] + \frac{(C_7\sqrt{\log(12/\delta')} + L_g D^2/2)}{T} \sum_{k=1}^t (1 - \frac{1}{T^{1/2}})^k \\
 &\leq \frac{C_7\sqrt{\log(12T/\delta)} + L_g D^2/2}{T^{1/2}}
 \end{aligned} \tag{75}$$

608 with probability  $1 - \delta$ .

609 For **upper-level**, by Lemma B.2, we have

$$\gamma_{t+1} \mathcal{G}(\mathbf{x}_t) \leq f(\mathbf{x}_t) - f(\mathbf{x}_{t+1}) + \gamma_{t+1} D \|\nabla f(\mathbf{x}_t) - \widehat{\nabla} f_t\| + \frac{L_f \gamma_{t+1}^2 D^2}{2} \tag{76}$$

610 By Lemma 4.3, we have  $\|\nabla f(\mathbf{x}_t) - \widehat{\nabla} f_t\| \leq 4L_f D\gamma\sqrt{\log(12/\delta')}$  with probability  $1 - \delta'$ . Plug it  
 611 and  $\gamma_{t+1} = 1/\sqrt{T}$  in inequality above to obtain,

$$\begin{aligned}
 \frac{1}{\sqrt{T}} \sum_{t=0}^{T-1} \mathcal{G}(\mathbf{x}_t) &\leq f(\mathbf{x}_0) - f(\mathbf{x}_T) + D \sum_{t=0}^{T-1} \gamma_{t+1} \|\nabla f(\mathbf{x}_t) - \widehat{\nabla} f_t\| + \frac{L_f D^2}{2} \sum_{t=0}^{T-1} \gamma_{t+1}^2 \\
 &\leq f(\mathbf{x}_0) - f(\mathbf{x}_T) + L_f D^2 (4\sqrt{\log(12\delta')} + 1/2)
 \end{aligned} \tag{77}$$

612 Divide both sides by  $\sqrt{T}$ , we can get, Let  $\mathbf{x}_o = \arg \min_{1 \leq t \leq T} \mathcal{G}(\mathbf{x}_t)$ , then

$$\mathcal{G}(\mathbf{x}_o) \leq \frac{1}{T} \sum_{t=0}^{T-1} \mathcal{G}(\mathbf{x}_t) \leq \frac{f(\mathbf{x}_0) - \underline{f} + L_f D^2 (4\sqrt{\log(12T/\delta)} + 1/2)}{T^{1/2}} \tag{78}$$

with probability  $1 - \delta$ . By letting  $C_8 = 5L_f D^2$ , the theorem is obtained.  $\square$

## E Azuma-Hoeffding-type inequalities

In this section, we present two useful vector versions of Azuma-Hoeffding-type concentration inequalities with uniform bound assumption or sub-gaussian assumption. They are crucial in our high probability analysis.

**Proposition E.1.** (Pinelis and other 1994 [40], Theorem 3.5) Let  $\zeta_1, \dots, \zeta_t \in \mathbb{R}^d$  be a vector-valued martingale difference sequence w.r.t. a filtration  $\{\mathcal{F}_t\}$ , i.e. for each  $\tau \in 1, \dots, t$ , we have  $\mathbb{E}[\zeta_\tau | \mathcal{F}_{\tau-1}] = 0$ . Suppose that  $\|\zeta_\tau\| \leq c_\tau$  almost surely. Then  $\forall t \geq 1$ ,

$$P(\|\sum_{\tau=1}^T \zeta_\tau\| \geq \lambda) \leq 4 \exp(-\frac{\lambda^2}{4 \sum_{\tau=1}^T c_\tau^2}) \quad (79)$$

**Proposition E.2.** (Jin et al. [47], Corollary 7) Let  $\zeta_1, \dots, \zeta_t \in \mathbb{R}^d$  be a vector-valued martingale difference sequence w.r.t. a filtration  $\{\mathcal{F}_t\}$ , i.e. for each  $\tau \in 1, \dots, t$ , we have  $\mathbb{E}[\zeta_\tau | \mathcal{F}_{\tau-1}] = 0$ . Suppose that  $\mathbb{E}[\exp(\|\zeta_\tau\|^2 / c_\tau^2)] \leq \exp(1)$ . Then there exists a absolute constant  $c$  such that, for any  $\delta > 0$ , with probability at least  $1 - \delta$ ,

$$\|\sum_{\tau=1}^T \zeta_\tau\| \leq c \cdot \sqrt{\sum_{\tau=1}^T c_\tau^2 \log \frac{2d}{\delta}} \quad (80)$$

This proposition was also used in previous literature including [42] and [33]. It is common to use such martingale inequality to obtain some high-probability results recently.

## F Experiment details

In this section, we include more details about the numerical experiments in Section 5. For completeness, we briefly introduce the update rules of aR-IP-SeG in [16] and DBGD in [13]. In the following, we use the notation  $\Pi_{\mathcal{Z}}(\cdot)$  to denote the Euclidean projection onto the set  $\mathcal{Z}$ .

The aR-IP-SeG algorithm is given by,

$$\begin{aligned} \mathbf{y}_{t+1} &= \Pi_{\mathcal{Z}}(\mathbf{x}_t - \gamma_t(\nabla \tilde{f}(\mathbf{x}_t, \theta_t)) + \rho_t \nabla \tilde{g}(\mathbf{x}_t, \xi_t)) \\ \mathbf{x}_{t+1} &= \Pi_{\mathcal{Z}}(\mathbf{x}_t - \gamma_t(\nabla \tilde{f}(\mathbf{y}_t, \theta'_t)) + \rho_t \nabla \tilde{g}(\mathbf{y}_t, \xi'_t)) \\ \Gamma_{t+1} &= \Gamma_t + (\gamma_t \rho_t)^r \\ \bar{\mathbf{y}}_{t+1} &= \frac{\Gamma_t \bar{\mathbf{y}}_t + (\gamma_t \rho_t)^r \mathbf{y}_{t+1}}{\Gamma_{t+1}} \end{aligned} \quad (81)$$

where  $\gamma_t$  is the stepsize,  $\rho_t$  is the regularization parameter, and  $\bar{\mathbf{y}}_T$  is the output of the algorithm. In this experiment, we choose  $\gamma_t = \gamma_0 / (t+1)^{3/4}$  and  $\rho_t = \rho_0 (t+1)^{1/4}$  for some constants  $\gamma_0$  and  $\rho_0$ . The DBGD-sto is a stochastic version of DBGD, which simply replaces the gradients in DBGD with stochastic gradients. Although the stochastic version of DBGD does not have a theoretical guarantee, it has been used to solve stochastic simple bilevel optimization problems in [13], which worked pretty well empirically. Hence, we use it as a baseline for solving stochastic simple bilevel problems and compare it with our proposed algorithms. The DBGD algorithm is given by

$$\mathbf{x}_{k+1} = \mathbf{x}_k - \gamma_k (\nabla f(\mathbf{x}_k) + \lambda_k \nabla g(\mathbf{x}_k))$$

where  $\gamma_k$  is the stepsize and we set  $\lambda_k$  as

$$\lambda_k = \max \left\{ \frac{\phi(\mathbf{x}_k) - \langle \nabla f(\mathbf{x}_k), \nabla g(\mathbf{x}_k) \rangle}{\|\nabla g(\mathbf{x}_k)\|^2}, 0 \right\} \quad \text{and} \quad \phi(\mathbf{x}) = \min \{ \alpha(g(\mathbf{x}) - \hat{g}), \beta \|\nabla g(\mathbf{x})\|^2 \}$$

where  $\alpha$  and  $\beta$  are hyperparameters and  $\hat{g}$  is a lower bound of  $g^*$ . In this experiment, we choose  $\hat{g} = 0$ . We also note that [13] only considered unconstrained simple bilevel optimization, i.e.  $\mathcal{Z} = \mathbb{R}^d$ . We further project  $\mathbf{x}_t$  onto  $\mathcal{Z}$  for each iteration to ensure the constraints are satisfied.

## 643 F.1 Over-parameterized regression

644 **Dataset generation.** The original Wikipedia Math Essential dataset [26] composes of a data matrix  
 645 of size  $1068 \times 731$ . We randomly select one of the columns as the outcome vector  $\mathbf{b} \in \mathbb{R}^{1068}$  and  
 646 the rest to be a new matrix  $\mathbf{A} \in \mathbb{R}^{1068 \times 731}$ . We set constraint parameter  $\lambda = 10$  in this experiment.  
 647 **Initialization.** We run the algorithm, SPIDER-FW [36], with stepsize chosen as  $\gamma_t = 0.1/(t+1)$  on  
 648 the lower-level problem in (1). We terminate the process to get  $\mathbf{x}_0$  as the initial point for both SBCGI  
 649 1 and SBCGF 2 after  $10^5$  stochastic oracle queries.  
 650 **Implementation details.** We query stochastic oracle  $9 \times 10^5$  times with stepsize  $\gamma_t = 0.01/(t+1)$   
 651 and  $\gamma = 10^{-5}$  for SBCGI 1 and SBCGF 2 with  $K_t = 10^{-4}/\sqrt{t+1}$ , respectively. In each iteration,  
 652 we need to solve the following subproblem induced by the methods,

$$\min_{\mathbf{s}} \langle \nabla f(\beta_k), \mathbf{s} \rangle \quad \text{s.t.} \quad \|\mathbf{s}\|_1 \leq \lambda, \langle \nabla g(\beta_k), \mathbf{s} - \beta_k \rangle \leq g(\beta_0) - g(\beta_k). \quad (82)$$

653 Introduce  $\mathbf{s}^+, \mathbf{s}^- \geq 0$  such that  $\mathbf{s} = \mathbf{s}^+ - \mathbf{s}^-$ . Then we can reformulate the problem above as follows,

$$\begin{aligned} \min_{\mathbf{s}^+, \mathbf{s}^-} \quad & \langle \nabla f(\beta_k), \mathbf{s}^+ - \mathbf{s}^- \rangle \\ \text{s.t.} \quad & \mathbf{s}^+, \mathbf{s}^- \geq 0, \langle \mathbf{s}^+, \mathbf{1} \rangle + \langle \mathbf{s}^-, \mathbf{1} \rangle \leq \lambda, \langle \nabla g(\beta_k), \mathbf{s}^+ - \mathbf{s}^- - \beta_k \rangle \leq g(\beta_0) - g(\beta_k), \end{aligned} \quad (83)$$

654 where  $\mathbf{1} \in \mathbb{R}^d$  is the all-one vector.

655 For aR-IP-SeG, we choose  $\gamma_0 = 10^{-7}$  and  $\rho_0 = 10^3$ . For DBGD, we set  $\alpha = \beta = 1$  and  $\gamma_t = 10^{-6}$ .

## 656 F.2 Dictionary learning

657 **Dataset generation.** We generate 500 sparse coefficient vectors  $\{\mathbf{x}_i\}_{i=1}^{250}$  and  $\{\mathbf{x}'_k\}_{k=1}^{250}$  with 5 random  
 658 nonzero entries, whose absolute values are drawn uniformly from  $[0.2, 1]$ . The entries of the random  
 659 noise vectors  $\{\mathbf{n}_i\}_{i=1}^{250}$  and  $\{\mathbf{n}'_k\}_{k=1}^{250}$  are drawn from i.i.d. Gaussian distribution with mean 0 and  
 660 standard deviation 0.01.

661 **Initialization.** We use a similar initialization procedure as [12], which consists of two phases. In  
 662 the first phase, we run the standard Frank-Wolfe algorithm on both the variables  $\mathbf{D} \in \mathbb{R}^{25 \times 40}$  and  
 663  $\mathbf{X} \in \mathbb{R}^{40 \times 250}$  for  $10^4$  iterations with the stepsize  $\gamma_t = 1/\sqrt{t+1}$ . Next, in the second phase, we  
 664 fix the variable  $\mathbf{X}$  and only update  $\mathbf{D}$  using the Frank-Wolfe algorithm with exact line search for  
 665 additional  $10^4$  iterations to obtain  $\tilde{\mathbf{D}}$  and  $\tilde{\mathbf{X}}$  as the initial point for the full bilevel problem.

666 **Implementation Details.** We choose  $\delta = 3$  in both problems (5). To be fair, all four algorithms  
 667 start from the same initial point. We slightly modify the initial point by letting  $\tilde{\mathbf{D}} \in \mathbb{R}^{25 \times 50}$  be  
 668 the concatenation of  $\tilde{\mathbf{D}} \in \mathbb{R}^{25 \times 40}$  and 10 columns of all zeros vectors. Furthermore, we initialize  
 669 another variable  $\tilde{\mathbf{X}}$  randomly by choosing its entries from a standard Gaussian distribution and then  
 670 normalizing each column to have a  $\ell_1$ -norm of  $\delta$ . We choose the stepsize as  $\gamma_t = 0.1/(t+1)^{2/3}$  and  
 671  $\gamma = 10^{-3}$  for our SBCGI 1 and SBCGF 2 with  $K_t = 0.01/(t+1)^{1/3}$ , respectively. Empirically, we  
 672 observe that taking one sample per iteration leads to a very unstable process in this problem. In this  
 673 case, we choose a mini-batch of size 8 for SBCGI, aR-IP-SeG, and the stochastic version of DBGD.  
 674 For each iteration, we will solve the following subproblem,

$$\min_{\tilde{\mathbf{D}}} \langle \nabla f_{\tilde{\mathbf{D}}}(\tilde{\mathbf{D}}_k, \tilde{\mathbf{X}}_k), \tilde{\mathbf{D}} \rangle \quad \text{s.t.} \quad \|\tilde{\mathbf{d}}_i\|_2 \leq 1, \langle \nabla g(\tilde{\mathbf{D}}_k), \tilde{\mathbf{D}} - \tilde{\mathbf{D}}_k \rangle \leq g(\tilde{\mathbf{D}}_0) - g(\tilde{\mathbf{D}}_k) \quad (84)$$

675 The above problem can be reformulated by using the KKT condition, which is equivalent to get a  
 676 root of the following one-dimensional nonlinear equation involving  $\lambda \geq 0$ :

$$\tilde{\mathbf{D}} = \Pi_{\mathcal{Z}} \left( \nabla f_{\tilde{\mathbf{D}}}(\tilde{\mathbf{D}}_k, \tilde{\mathbf{X}}_k) + \lambda \nabla g(\tilde{\mathbf{D}}_k) \right), \quad \langle \nabla g(\tilde{\mathbf{D}}_k), \tilde{\mathbf{D}} - \tilde{\mathbf{D}}_k \rangle = g(\tilde{\mathbf{D}}_0) - g(\tilde{\mathbf{D}}_k) \quad (85)$$

677 where the projection onto  $\mathcal{Z} = \{\tilde{\mathbf{D}} \in \mathbb{R}^{25 \times 40} : \|\tilde{\mathbf{d}}_i\|_2 \leq 1, i = 1, \dots, 40\}$  is equivalent to project  
 678 each column on the Euclidean ball. In practice, the reformulated problem can be solved efficiently by  
 679 MATLAB's root-finding solver.

680 For aR-IP-SeG, we choose  $\gamma_0 = 10^{-4}$  and  $\rho_0 = 1$ . For the stochastic version of DBGD, we set  
 681  $\alpha = \beta = 100$  and  $\gamma_t = 5 \times 10^{-3}$ .

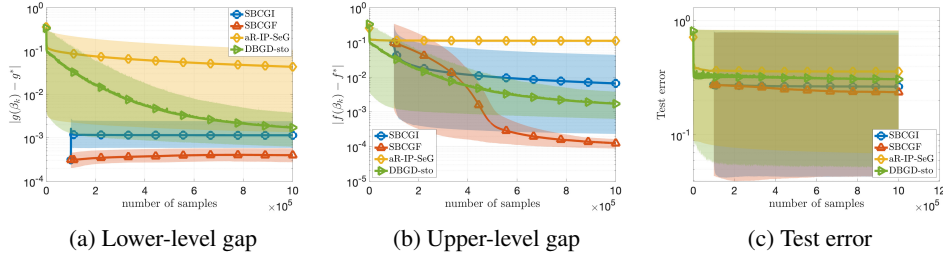

Figure 3: Comparison of SBCGI, SBCGF, aR-IP-SeG, and DBGD-Sto for solving Problem (3) with 10 different random seeds

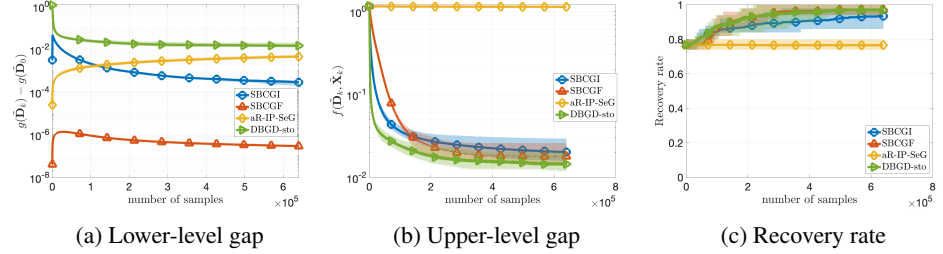

Figure 4: Comparison of SBCGI, SBCGF, aR-IP-SeG, and DBGD-Sto for solving Problem (5) with 10 different random seeds

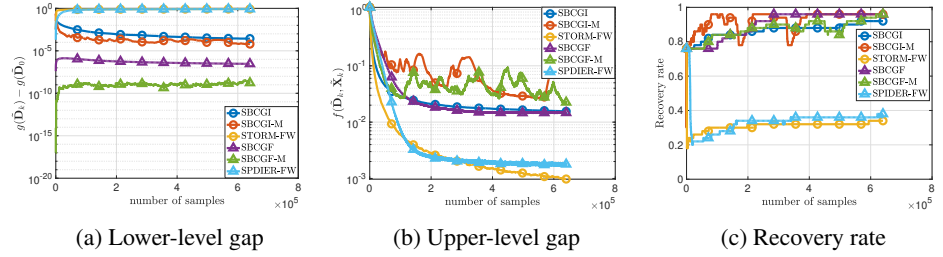

Figure 5: Comparison of SBCGI, SBCGF, SBCGI-M, SBCGF-M, STORM-FW, and SPIDER-FW for solving Problem (5).

### 682 F.3 Experiments with different random seeds

683 We further repeat the experiment 10 times with different random seeds to see more realizations of the  
 684 stochastic algorithms. The results are reported in Figure 3 and Figure 4. The solid lines denote the  
 685 average statistics over 10 trials of the algorithms. While the shaded regions surrounding each line  
 686 reflect the span of all the random instances involved. Figure 3 and Figure 4 present similar results as  
 687 Figure 1 and Figure 2, which eliminates the possibility of choosing a particularly good instance.

### 688 F.4 Importance of the right cutting plane

689 In this section, we numerically illustrate the importance of choosing the right cutting plane on  
 690 Example 2 (dictionary learning). Specifically, we compare our proposed methods with the ones  
 691 without a cutting plane and with an unregularized cutting plane (without additional term  $K_t$ ).  
 692 If we replace the stochastic cutting plane (9) with the unregularized cutting plane (8) in SBCGI 1 and  
 693 SBCGF 2, then the algorithm usually fail at some point in the process, depending on the datasets and  
 694 parameters chosen, based on our experimental observations. More specifically, algorithms' failure  
 695 means that the subproblem of dictionary learning (85) is infeasible. So we slightly modify it by  
 696 adding a checkpoint before solving the subproblem. If the subproblem is infeasible at the current

697 iteration, then we choose the update direction  $\mathbf{s}_t = \widehat{\nabla} g_t$ . This adjustment prevents unnecessary  
 698 interruptions during the process and enforce the algorithms to focus only on the lower-level problem  
 699 when the subproblem is infeasible. We denote the modified algorithms SBCGI-M and SBCGF-M.  
 700 Moreover, we also take SBCGI and SBCGF without cutting planes into consideration, denoted as  
 701 STORM-FW and SPIDER-FW. In fact, in this case, the bilevel algorithms degenerate to single-level  
 702 projection-free algorithms similar to algorithms in [33] and [36].  
 703 Figure 5 (a) indicates that SBCGI-M and SBCGF-M focus more on the lower-level problem due  
 704 to the design of the algorithms and extremely unstable as we can see in Figure 5 (b)(c). While  
 705 STORM-FW and SPIDER-FW only focus on the upper-level problem, which leads to terrible results  
 706 on the lower-level gap and recovery rate.
